# Supplementary material for: How do patients with chest pain access Emergency Department care?
Source: PubMed Central journal article supplement — Eur J Emerg Med. 2016 Apr 26;24(6):423–7. doi: 10.1097/MEJ.0000000000000393 (PMC5671801; doi:10.1097/mej.0000000000000393), 2016-04-26
Supplement: mej-24-423-s001.pdf [file mej-24-423-s001.pdf]

| APPENDIX 1: Duration between symptoms onset and arrival at the ED according to patient characteristics |                                 |                                                       |     |      |     |       |     |      |     |      |
|--------------------------------------------------------------------------------------------------------|---------------------------------|-------------------------------------------------------|-----|------|-----|-------|-----|------|-----|------|
|                                                                                                        |                                 | Duration between symptoms onset and arrival at the ED |     |      |     |       |     |      |     | p*   |
|                                                                                                        |                                 | <1U                                                   |     | 1-3U |     | 3-12U |     | >12U |     |      |
|                                                                                                        |                                 | n                                                     | %   | n    | %   | n     | %   | n    | %   |      |
| Age                                                                                                    | 18-34                           | 4                                                     | 17% | 5    | 22% | 6     | 26% | 8    | 35% |      |
|                                                                                                        | 35-49                           | 4                                                     | 7%  | 20   | 36% | 15    | 27% | 16   | 29% |      |
|                                                                                                        | 50-64                           | 10                                                    | 8%  | 34   | 27% | 36    | 29% | 45   | 36% |      |
|                                                                                                        | 65+                             | 17                                                    | 9%  | 56   | 29% | 74    | 38% | 49   | 25% |      |
|                                                                                                        | Total                           | 35                                                    | 9%  | 115  | 29% | 131   | 33% | 118  | 30% | 0,35 |
| Gender                                                                                                 | Woman                           | 2                                                     | 2%  | 36   | 30% | 43    | 35% | 41   | 34% |      |
|                                                                                                        | Man                             | 33                                                    | 12% | 80   | 29% | 88    | 31% | 79   | 28% |      |
|                                                                                                        | Total                           | 35                                                    | 9%  | 116  | 29% | 131   | 33% | 120  | 30% | 0,01 |
| Origin                                                                                                 | Belgium                         | 23                                                    | 8%  | 84   | 30% | 88    | 31% | 89   | 31% |      |
|                                                                                                        | Netherlands                     | 1                                                     | 6%  | 5    | 29% | 7     | 41% | 4    | 24% |      |
|                                                                                                        | Italy                           | 4                                                     | 8%  | 2    | 8%  | 4     | 38% | 3    | 46% |      |
|                                                                                                        | Other                           | 1                                                     | 31% | 1    | 15% | 5     | 31% | 6    | 23% |      |
|                                                                                                        | Total                           | 29                                                    | 9%  | 92   | 28% | 104   | 32% | 102  | 31% | 0,18 |
| Education                                                                                              | Primary                         | 0                                                     | 0%  | 8    | 47% | 3     | 18% | 6    | 35% |      |
|                                                                                                        | Lower secondary                 | 4                                                     | 13% | 7    | 23% | 9     | 30% | 10   | 33% |      |
|                                                                                                        | Higher secondary                | 7                                                     | 8%  | 32   | 36% | 33    | 37% | 18   | 20% |      |
|                                                                                                        | Bachelor                        | 4                                                     | 6%  | 26   | 38% | 23    | 34% | 15   | 22% |      |
|                                                                                                        | Master                          | 3                                                     | 9%  | 12   | 35% | 13    | 38% | 6    | 18% |      |
|                                                                                                        | Total                           | 18                                                    | 8%  | 85   | 36% | 81    | 34% | 55   | 23% | 0,6  |
| First action                                                                                           | GP contact                      | 12                                                    | 7%  | 44   | 24% | 61    | 33% | 66   | 36% |      |
|                                                                                                        | ED                              | 11                                                    | 13% | 36   | 43% | 20    | 24% | 16   | 19% |      |
|                                                                                                        | Other                           | 14                                                    | 10% | 38   | 27% | 49    | 35% | 39   | 28% |      |
|                                                                                                        | Total                           | 37                                                    | 9%  | 118  | 29% | 130   | 32% | 121  | 30% | 0,05 |
| Similar symptoms in past                                                                               | No                              | 16                                                    | 9%  | 43   | 25% | 51    | 29% | 64   | 37% |      |
|                                                                                                        | Yes                             | 21                                                    | 9%  | 76   | 32% | 79    | 34% | 58   | 25% |      |
|                                                                                                        | Total                           | 37                                                    | 9%  | 119  | 29% | 130   | 32% | 122  | 30% | 0,58 |
| Chest pain and other symptoms                                                                          | Dyspnoea                        | 3                                                     | 3%  | 20   | 20% | 43    | 42% | 36   | 35% |      |
|                                                                                                        | Dyspnoea and vasovagal reaction | 1                                                     | 3%  | 17   | 44% | 11    | 28% | 10   | 26% |      |
|                                                                                                        | Vasovagal reaction              | 16                                                    | 17% | 34   | 37% | 23    | 25% | 20   | 22% |      |
|                                                                                                        | Other                           | 7                                                     | 14% | 20   | 41% | 10    | 20% | 12   | 24% |      |
|                                                                                                        | None                            | 9                                                     | 7%  | 28   | 23% | 43    | 35% | 43   | 35% |      |
|                                                                                                        | Total                           | 36                                                    | 9%  | 119  | 29% | 130   | 32% | 121  | 30% | 0,00 |
| Place of symptoms onset                                                                                | Home                            | 25                                                    | 8%  | 86   | 27% | 109   | 34% | 99   | 31% |      |
|                                                                                                        | Work                            | 4                                                     | 12% | 14   | 41% | 5     | 15% | 11   | 32% |      |
|                                                                                                        | Public                          | 3                                                     | 12% | 7    | 27% | 8     | 31% | 8    | 31% |      |
|                                                                                                        | Family                          | 3                                                     | 30% | 6    | 60% | 1     | 10% | 0    | 0%  |      |
|                                                                                                        | Other                           | 2                                                     | 11% | 6    | 32% | 8     | 42% | 3    | 16% |      |
|                                                                                                        | Total                           | 37                                                    | 9%  | 119  | 29% | 131   | 32% | 121  | 30% | 0,04 |
| Transport to ED                                                                                        | Self drive                      | 3                                                     | 5%  | 17   | 26% | 17    | 26% | 28   | 43% |      |
|                                                                                                        | Ambulance                       | 16                                                    | 14% | 49   | 40% | 73    | 31% | 74   | 15% |      |
|                                                                                                        | Other                           | 18                                                    | 8%  | 53   | 23% | 41    | 34% | 19   | 35% |      |
|                                                                                                        | Total                           | 37                                                    | 9%  | 119  | 29% | 131   | 32% | 121  | 30% | 0,00 |
| Diagnosis                                                                                              | ACS                             | 12                                                    | 9%  | 42   | 30% | 45    | 32% | 42   | 30% |      |
|                                                                                                        | Cardiovascular                  | 2                                                     | 2%  | 24   | 29% | 25    | 30% | 31   | 38% |      |
|                                                                                                        | Other                           | 23                                                    | 13% | 52   | 28% | 61    | 33% | 47   | 26% |      |
|                                                                                                        | Total                           | 37                                                    | 9%  | 118  | 29% | 131   | 32% | 120  | 30% | 0,15 |

\*p value based on chi<sup>2</sup> for trend

ED: Emergency Department, GP: General Practitioner, ACS: Acute Coronary Syndrome

| APPENDIX 2: Actions stratified by characteristic of patients |                        |            |      |               |      |       |      |
|--------------------------------------------------------------|------------------------|------------|------|---------------|------|-------|------|
|                                                              |                        | GP contact |      | No GP contact |      | Total |      |
|                                                              |                        | n          | %    | n             | %    | n     | %    |
| Age                                                          | 18-34                  | 9          | 4%   | 16            | 7%   | 23    | 6%   |
|                                                              | 35-49                  | 23         | 10%  | 36            | 16%  | 54    | 14%  |
|                                                              | 50-64                  | 69         | 31%  | 70            | 30%  | 124   | 31%  |
|                                                              | 65+                    | 124        | 55%  | 109           | 47%  | 199   | 50%  |
|                                                              | Total                  | 225        | 100% | 231           | 100% | 400   | 100% |
| Gender                                                       | Woman                  | 82         | 36%  | 62            | 27%  | 122   | 30%  |
|                                                              | Man                    | 145        | 64%  | 170           | 73%  | 281   | 70%  |
|                                                              | Total                  | 227        | 100% | 232           | 100% | 403   | 100% |
| Origin                                                       | Belgium                | 165        | 90%  | 159           | 85%  | 283   | 87%  |
|                                                              | Netherlands            | 9          | 5%   | 11            | 6%   | 17    | 5%   |
|                                                              | Italy                  | 6          | 3%   | 7             | 4%   | 13    | 4%   |
|                                                              | Other                  | 4          | 2%   | 10            | 5%   | 13    | 4%   |
|                                                              | Total                  | 184        | 100% | 187           | 100% | 326   | 100% |
| Education                                                    | Primary                | 10         | 8%   | 10            | 7%   | 17    | 7%   |
|                                                              | Lower secondary        | 21         | 17%  | 13            | 9%   | 30    | 13%  |
|                                                              | Higher secondary       | 50         | 40%  | 59            | 41%  | 90    | 38%  |
|                                                              | Bachelor               | 31         | 25%  | 38            | 27%  | 68    | 28%  |
|                                                              | Master                 | 14         | 11%  | 23            | 16%  | 34    | 14%  |
|                                                              | Total                  | 126        | 100% | 143           | 100% | 239   | 100% |
| Duration between symptoms onset and arrival at the ED        | <1U                    | 19         | 8%   | 25            | 11%  | 37    | 9%   |
|                                                              | 1-3U                   | 53         | 23%  | 77            | 33%  | 118   | 29%  |
|                                                              | 3-12U                  | 79         | 34%  | 73            | 31%  | 131   | 32%  |
|                                                              | >12U                   | 80         | 35%  | 58            | 25%  | 121   | 30%  |
|                                                              | Total                  | 231        | 100% | 233           | 100% | 407   | 100% |
| Same symptoms in past                                        | No                     | 111        | 48%  | 95            | 40%  | 174   | 43%  |
|                                                              | Yes                    | 120        | 52%  | 140           | 60%  | 235   | 57%  |
|                                                              | Total                  | 231        | 100% | 235           | 100% | 409   | 100% |
| Chest pain and other symptoms                                | Dyspnoea               | 68         | 29%  | 57            | 24%  | 103   | 25%  |
|                                                              | Dyspnoea and vasovagal | 23         | 10%  | 20            | 9%   | 39    | 10%  |
|                                                              | Vasovagal reaction     | 50         | 22%  | 58            | 25%  | 93    | 23%  |
|                                                              | Other                  | 24         | 10%  | 31            | 13%  | 50    | 12%  |
|                                                              | None                   | 66         | 29%  | 67            | 29%  | 123   | 30%  |
|                                                              | Total                  | 231        | 100% | 233           | 100% | 408   | 100% |
| Place of symptoms onset                                      | Home                   | 197        | 85%  | 172           | 73%  | 322   | 79%  |
|                                                              | Work                   | 14         | 6%   | 20            | 9%   | 33    | 8%   |
|                                                              | Public                 | 12         | 5%   | 18            | 8%   | 26    | 6%   |
|                                                              | Family                 | 4          | 2%   | 8             | 3%   | 10    | 2%   |
|                                                              | Other                  | 5          | 2%   | 17            | 7%   | 19    | 5%   |
|                                                              | Total                  | 232        | 100% | 235           | 100% | 410   | 100% |
| Transport to ED                                              | Self drive             | 33         | 14%  | 39            | 17%  | 65    | 16%  |
|                                                              | Ambulance              | 72         | 31%  | 84            | 36%  | 132   | 32%  |
|                                                              | Other                  | 127        | 55%  | 112           | 48%  | 213   | 52%  |
|                                                              | Total                  | 232        | 100% | 235           | 100% | 410   | 100% |
| Diagnosis                                                    | ACS                    | 82         | 35%  | 80            | 34%  | 141   | 35%  |
|                                                              | Cardiovascular         | 45         | 19%  | 53            | 23%  | 84    | 21%  |
|                                                              | Other                  | 104        | 45%  | 101           | 43%  | 183   | 45%  |
|                                                              | Total                  | 231        | 100% | 234           | 100% | 408   | 100% |
| Anxiety                                                      | 0                      | 22         | 10%  | 19            | 8%   | 34    | 9%   |
|                                                              | 1-4                    | 48         | 21%  | 45            | 20%  | 81    | 20%  |
|                                                              | 5-8                    | 131        | 58%  | 137           | 60%  | 236   | 59%  |
|                                                              | 9-10                   | 24         | 11%  | 29            | 12%  | 49    | 12%  |
|                                                              | Total                  | 225        | 100% | 230           | 100% | 400   | 100% |

ED: Emergency Department, GP: General Practitioner, ACS: Acute Coronary Syndrome
